# Supplementary material for: Ecological and Health Risk Assessment of Heavy Metals in Farmland in the South of Zhangbei County, Hebei Province, China
Source: MDPI journal article supplement (doi:10.3390/app122312425), 2022-12-05
Supplement: s1 [file s1]

## **Supplementary Materials**

### **Ecological and health risk assessment of heavy metal in farmland in the south of Zhangbei County, Hebei Province**

**Yanhua Li <sup>2</sup>, Qing Zhu <sup>1</sup>, Xuejiao Tang <sup>1</sup>, Cuiping Wang <sup>1,\*</sup> and Sheng Zhai <sup>2,\*</sup>**

<sup>1</sup> Key Laboratory of Pollution Processes and Environmental Criteria, Ministry of Education, Tianjin Key Laboratory of Environmental Remediation and Pollution Control, College of Environmental Science and Engineering, Nankai University, Tianjin 300071, China

<sup>2</sup> School of Geography and Environment, Liaocheng University, Liaocheng 252000, China

\* Correspondence: cpw [wangcp@nankai.edu.cn](mailto:wangcp@nankai.edu.cn); sz [zhaisheng@lcu.edu.cn](mailto:zhaisheng@lcu.edu.cn)

## **Table of contents**

**Table S1** Risk screening values for soil contamination of agriculture land

**Table S2** Classification standard of Potential Ecological Risk of heavy metal in soils

**Table S3** Exposure parameter values of health risk assessment

**Table S4** Heavy metal exposure reference dose ( $RFE_i$ ) and slope factor ( $CSF_i$ )

**Table S5** PCA analysis in oats soil.

**Table S1.** Risk screening values for soil contamination of agriculture land

| Land use<br>type | elements | Risk screening values |            |            |        |
|------------------|----------|-----------------------|------------|------------|--------|
|                  |          | pH≤5.5                | 5.5<pH≤6.5 | 6.5<pH≤7.5 | pH>7.5 |
| other            | Cd       | 0.3                   | 0.3        | 0.3        | 0.6    |
|                  | Hg       | 1.3                   | 1.8        | 2.4        | 3.4    |
|                  | As       | 40                    | 40         | 30         | 25     |
|                  | Pb       | 70                    | 90         | 120        | 170    |
|                  | Cr       | 150                   | 150        | 200        | 250    |
|                  | Cu       | 50                    | 50         | 100        | 100    |
|                  | Ni       | 60                    | 70         | 100        | 190    |
|                  | Zn       | 200                   | 200        | 250        | 300    |

**Table S2.** Classification standard of Potential Ecological Risk of heavy metal in soils

| Ecological Risk Index (E <sub>i</sub> ) | Total Potential Ecological |  | Assessment | Level |
|-----------------------------------------|----------------------------|--|------------|-------|
|                                         | Risk Index (RI)            |  |            |       |
| E <sub>i</sub> <40                      | RI<110                     |  | light      | I     |
| 40≤E <sub>i</sub> <80                   | 110≤RI<220                 |  | medium     | II    |
| 80≤E <sub>i</sub> <160                  | 220≤RI<440                 |  | severe     | III   |
| 160≤E <sub>i</sub> <320                 |                            |  | intensity  | IV    |
| E <sub>i</sub> ≥320                     | RI≥440                     |  | strong     | V     |

**Table S3.** Exposure parameter values of health risk assessment

| Parameters | Description                     | Units                            | Values                                             |                      | References              |
|------------|---------------------------------|----------------------------------|----------------------------------------------------|----------------------|-------------------------|
|            |                                 |                                  | Adults                                             | Children             |                         |
| C          | Measured heavy metal content    | mg·kg <sup>-1</sup>              |                                                    |                      | In this study           |
| IngR       | Ingestion rate of soil          | mg·d <sup>-1</sup>               | 100                                                | 200                  | (Zhao et al. 2019)      |
| EF         | Exposure frequency              | d·a <sup>-1</sup>                | 350                                                | 365                  | (Hertzberg et al. 2000) |
| ED         | Exposure duration               | years                            | 30                                                 | 6                    | (Hu et al. 2020)        |
| BW         | Average body weight             | kg                               | 61.8                                               | 16.2                 | (Zhao et al. 2019)      |
| AT         | Average body weight             | d                                | 365*ED (non-carcinogenic)<br>70*365 (carcinogenic) |                      | (Huang et al. 2021)     |
| CF         | Conversion factor from kg to mg | kg·mg <sup>-1</sup>              | 10 <sup>-6</sup>                                   | 10 <sup>-6</sup>     | (Hu et al. 2020)        |
| PEF        | Emission factor                 | m <sup>3</sup> ·kg <sup>-1</sup> | 1.36×10 <sup>9</sup>                               | 1.36×10 <sup>9</sup> | (Zhao et al. 2019)      |
| InhR       | Inhalation rate                 | m <sup>3</sup> ·d <sup>-1</sup>  | 15                                                 | 7.5                  | (Zhao et al. 2019)      |
| SA         | Surface area of skin            | cm <sup>2</sup>                  | 4350                                               | 1600                 | (Hu et al. 2020)        |

|     |                          |                                                     |       |       |                     |
|-----|--------------------------|-----------------------------------------------------|-------|-------|---------------------|
| SL  | Skin adherence factor    | $\text{mg} \cdot (\text{cm}^2 \cdot \text{d})^{-1}$ | 0.2   | 0.2   | (Huang et al. 2021) |
| ABS | Dermal absorption factor | uniteless                                           | 0.001 | 0.001 | (Zhao et al. 2019)  |

---

**Table S4.** Heavy metal exposure reference dose (RFE<sub>i</sub>) and slope factor (CSF<sub>i</sub>)

| Elements | RFE <sub>i</sub> (mg·kg <sup>-1</sup> ·d <sup>-1</sup> ) |                       |                       | CSF <sub>i</sub> ((mg·kg <sup>-1</sup> ·d <sup>-1</sup> ) <sup>-1</sup> ) |                       |                | References                                         |
|----------|----------------------------------------------------------|-----------------------|-----------------------|---------------------------------------------------------------------------|-----------------------|----------------|----------------------------------------------------|
|          | Ingestion                                                | Inhalation            | Dermal contact        | Ingestion                                                                 | Inhalation            | Dermal contact |                                                    |
| Cd       | 1.00×10 <sup>-3</sup>                                    | 1.00×10 <sup>-3</sup> | 2.5x10 <sup>-5</sup>  | 6.10                                                                      | 1.80×10 <sup>-3</sup> | 6.10           | (Hui et al. 2021; Yakamercan, Ari, and Aygün 2021) |
| Cu       | 4.00×10 <sup>-2</sup>                                    | 4.02×10 <sup>-2</sup> | 1.2x10 <sup>-2</sup>  | ND                                                                        | ND                    | ND             | (Yakamercan, Ari, and Aygün 2021)                  |
| Pb       | 3.50×10 <sup>-3</sup>                                    | 3.52×10 <sup>-3</sup> | 5.24x10 <sup>-4</sup> | ND                                                                        | ND                    | ND             | (Yakamercan, Ari, and Aygün 2021)                  |
| Zn       | 3.00×10 <sup>-1</sup>                                    | 3.00×10 <sup>-1</sup> | 6x10 <sup>-2</sup>    | ND                                                                        | ND                    | ND             | (Yakamercan, Ari, and Aygün 2021)                  |
| Cr       | 3.00×10 <sup>-3</sup>                                    | 2.86×10 <sup>-5</sup> | 6x10 <sup>-5</sup>    | ND                                                                        | 42                    | ND             | (Yakamercan, Ari, and Aygün 2021)                  |
| As       | 3.00×10 <sup>-4</sup>                                    | 1.23×10 <sup>-4</sup> | 1.23x10 <sup>-4</sup> | 1.50                                                                      | 4.30×10 <sup>-3</sup> | 1.50           | (Yakamercan, Ari, and Aygün 2021; Lim et al. 2008) |
| Hg       | 3.00×10 <sup>-4</sup>                                    | 3.00×10 <sup>-4</sup> | 1.84x10 <sup>-3</sup> | ND                                                                        | ND                    | ND             | (Yakamercan, Ari, and Aygün 2021)                  |
| Ni       | 3.00×10 <sup>-4</sup>                                    | 1.23×10 <sup>-4</sup> | 1.23x10 <sup>-4</sup> | ND                                                                        | 8.40×10 <sup>-1</sup> | ND             | (Yakamercan, Ari, and Aygün 2021)                  |

**Table S5.** PCA analysis in oats soil.

| elements                        | PC1    | PC2    | PC3    |
|---------------------------------|--------|--------|--------|
| Cd                              | 0.598  | -0.36  | 0.787  |
| Cu                              | 0.9    | 0.022  | -0.277 |
| Pb                              | -0.388 | 0.875  | 0.201  |
| Zn                              | 0.855  | 0.142  | -0.375 |
| Cr                              | 0.772  | 0.527  | -0.128 |
| As                              | -0.087 | 0.972  | 0.021  |
| Hg                              | 0.585  | -0.068 | 0.801  |
| Ni                              | 0.961  | -0.067 | -0.198 |
| Cumulative total<br>variance(%) | 48.972 | 74.204 | 93.879 |

## References

- Hertzberg, R, H Choudhury, G Rice, J Coglianò, D Mukerjee, and L Teuschler. 2000. "Supplementary guidance for conducting health risk assessment of chemical mixtures." In *Washington, DC, Risk Assessment Forum Technical Panel*.
- Hu, Bifeng, Shuai Shao, Hao Ni, Zhiyi Fu, Linshu Hu, Yin Zhou, Xiaoxiao Min, Shufeng She, Songchao Chen, Mingxiang Huang, Lianqing Zhou, Yan Li, and Zhou Shi. 2020. 'Current status, spatial features, health risks, and potential driving factors of soil heavy metal pollution in China at province level', *Environmental Pollution*, 266:

114961.

- Huang, Jingling, Yuying Wu, Jiaxun Sun, Xiao Li, Xiaolei Geng, Menglu Zhao, Ting Sun, and Zhengqiu Fan. 2021. 'Health risk assessment of heavy metal(loid)s in park soils of the largest megacity in China by using Monte Carlo simulation coupled with Positive matrix factorization model', *Journal of Hazardous Materials*, 415: 125629.
- Hui, Wang, Zhang Hao, Tang Hongyan, Wen Jiawei, and Li Anna. 2021. 'Heavy metal pollution characteristics and health risk evaluation of soil around a tungsten-molybdenum mine in Luoyang, China', *Environmental Earth Sciences*, 80: 293.
- Lim, Hye-Sook, Jin-Soo Lee, Hyo-Taek Chon, and Manfred Sager. 2008. 'Heavy metal contamination and health risk assessment in the vicinity of the abandoned Songcheon Au–Ag mine in Korea', *Journal of Geochemical Exploration*, 96: 223-30.
- Yakamercan, Elif, Akif Ari, and Ahmet Aygün. 2021. 'Land application of municipal sewage sludge: Human health risk assessment of heavy metals', *Journal of Cleaner Production*, 319: 128568.
- Zhao, Rui, Qingyu Guan, Haiping Luo, Jinkuo Lin, Liqin Yang, Feifei Wang, Ninghui Pan, and Yanyan Yang. 2019. 'Fuzzy synthetic evaluation and health risk assessment quantification of heavy metals in Zhangye agricultural soil from the perspective of sources', *Science of The Total Environment*, 697: 134126.
